# Supplementary material for: Maternal Diet Supplementation with n-6/n-3 Essential Fatty Acids in a 1.2 : 1.0 Ratio Attenuates Metabolic Dysfunction in MSG-Induced Obese Mice
Source: Hindawi journal article supplement (doi:10.1155/2016/9242319), 2016-01-01
Supplement: f1 [file 9242319.f1.pdf]

## Supplementary material

**Table S1** Ratio of essential fatty acids in commercial and golden flaxseed flour/sunflower oil supplemented diet.

| Fatty acids  | Treatment (% of total lipids) |              |
|--------------|-------------------------------|--------------|
|              | Com-diet                      | Flax-diet    |
| 14:0         | 0.10 ± 0.00                   | 0.25 ± 0.23  |
| 16:0         | 13.70 ± 0.06                  | 6.15 ± 0.07  |
| 18:0         | 3.27 ± 0.02                   | 4.15 ± 0.02  |
| 18:1 (n-9)   | 26.15 ± 0.23                  | 26.19 ± 0.05 |
| 18:2 (n-6)   | 49.97 ± 0.24                  | 33.85 ± 0.05 |
| 18:3 (n-3)   | 4.67 ± 0.15                   | 28.11 ± 0.64 |
| 20:0         | 0.39 ± 0.03                   | 0.19 ± 0.01  |
| 20:1 (n-9)   | 0.33 ± 0.01                   | 0.18 ± 0.01  |
| 22:0         | 0.36 ± 0.02                   | 0.40 ± 0.01  |
| 24:0         | 0.27 ± 0.01                   | 0.17 ± 0.01  |
| n-6/n-3 rate | 10.70 ± 1.60                  | 1.20 ± 0.08  |

Data are expressed as mean ± SEM of three replicates. Com-diet, commercial diet; Flax-diet, diet containing sunflower oil supplemented with flaxseed powder.

**Table S2** Polyunsaturated fatty acids concentration in the brain tissue from mice at 21-day-old.

| PUFAs ( $\mu\text{g mg}^{-1}$ ) | Treatment       |                     |                 |                     |
|---------------------------------|-----------------|---------------------|-----------------|---------------------|
|                                 | Control-Com     | Control-Flax        | MSG-Com         | MSG-Flax            |
| LA, 18:2 (n-6)                  | $0.18 \pm 0.05$ | $0.25 \pm 0.02$     | $0.21 \pm 0.02$ | $0.32 \pm 0.05$     |
| LNA, 18:3 (n-3)                 | $0.04 \pm 0.01$ | $0.10 \pm 0.01$ *   | $0.05 \pm 0.01$ | $0.08 \pm 0.01$ *   |
| EDA, 20:2 (n-6)                 | $0.05 \pm 0.01$ | $0.08 \pm 0.00$ *   | $0.06 \pm 0.01$ | $0.06 \pm 0.01$     |
| DGLA, 20:3 (n-6)                | $0.10 \pm 0.02$ | $0.26 \pm 0.04$ *\$ | $0.12 \pm 0.01$ | $0.20 \pm 0.03$ *\$ |
| AA, 20:4 (n-6)                  | $1.62 \pm 0.24$ | $2.39 \pm 0.15$     | $2.08 \pm 0.15$ | $2.37 \pm 0.24$     |
| EPA, 20:5 (n-3)                 | nq              | $0.02 \pm 0.00$     | nq              | $0.03 \pm 0.01$     |
| DPA, 22:5 (n-3)                 | $0.02 \pm 0.00$ | $0.07 \pm 0.00$ *\$ | $0.02 \pm 0.00$ | $0.09 \pm 0.01$ *\$ |
| DHA, 22:6 (n-3)                 | $1.99 \pm 0.32$ | $3.38 \pm 0.30$ *   | $2.54 \pm 0.18$ | $3.41 \pm 0.31$ *   |

Data mean  $\pm$  SEM for three replicate for each experimental group. Superscript symbols in the same line means statistical difference between the groups by one-way ANOVA, where \* depicts statistical difference with  $P < 0.05$  compared to Control-Com group and \$ depicts statistical difference with  $P < 0.05$  compared to MSG-Com group. AA, arachidonic acid; LNA, alpha-linolenic acid; DGLA, dihomo-gamma-linolenic acid; DHA, docosahexaenoic acid; DPA, docosapentaenoic acid; EPA, eicosapentaenoic acid; EDA, eicosadienoic acid; LA, linoleic acid; . nq, no quantified (values  $< 0.01 \mu\text{g mg}^{-1}$  of tissue).

**Table S3** Polyunsaturated fatty acids concentration in the pancreatic tissues from mice at 21-day-old.

| PUFAs ( $\mu\text{g mg}^{-1}$ ) | Treatment       |                       |                   |                       |
|---------------------------------|-----------------|-----------------------|-------------------|-----------------------|
|                                 | Control-Com     | Control-Flax          | MSG-Com           | MSG-Flax              |
| LA, 18:2 (n-6)                  | $5.45 \pm 0.32$ | $3.15 \pm 0.87^{*\$}$ | $5.72 \pm 0.56$   | $3.78 \pm 0.16^{*\$}$ |
| LNA, 18:3 (n-3)                 | $0.05 \pm 0.01$ | $0.21 \pm 0.04^*$     | $0.15 \pm 0.04^*$ | $0.80 \pm 0.12^{*\$}$ |
| EDA, 20:2 (n-6)                 | $0.16 \pm 0.02$ | $0.11 \pm 0.02^{\$}$  | $0.36 \pm 0.04^*$ | $0.12 \pm 0.01^{\$}$  |
| DGLA, 20:3 (n-6)                | $0.31 \pm 0.03$ | $0.45 \pm 0.06^{\$}$  | $0.28 \pm 0.03$   | $0.21 \pm 0.03$       |
| AA, 20:4 (n-6)                  | $3.03 \pm 0.41$ | $2.75 \pm 0.42^{\$}$  | $5.29 \pm 0.23^*$ | $1.53 \pm 0.14^{*\$}$ |
| EPA, 20:5 (n-3)                 | $0.31 \pm 0.03$ | $1.02 \pm 0.16^{*\$}$ | $0.13 \pm 0.02^*$ | $0.88 \pm 0.07^{*\$}$ |
| DPA, 22:5 (n-3)                 | $0.24 \pm 0.03$ | $0.70 \pm 0.08^{*\$}$ | $0.28 \pm 0.02$   | $0.50 \pm 0.05^{*\$}$ |
| DHA 22:6 (n-3)                  | $0.44 \pm 0.05$ | $0.92 \pm 0.09^{*\$}$ | $0.61 \pm 0.05$   | $0.63 \pm 0.06$       |

Data mean  $\pm$  SEM for three replicate for each experimental group. Superscript **symbols** in the same line means statistical difference between the groups by one-way ANOVA, where **\*** depicts statistical difference with  $P < 0.05$  compared to Control-Com group and **§** depicts statistical difference with  $P < 0.05$  compared to MSG-Com group. AA, arachidonic acid; LNA, alpha-linolenic acid; DGLA, dihomo-gamma-linolenic acid; DHA, docosahexaenoic acid; DPA, docosapentaenoic acid; EPA, eicosapentaenoic acid; EDA, eicosadienoic acid; LA, linoleic acid.
